# Supplementary material
Source: PubMed Central journal article supplement (PMC5360461)
Supplement: NIHMS835052-supplement-01.pdf [file NIHMS835052-supplement-01.pdf]

Supplement Table 1. Pittsburgh Sleep Quality Index (PSQI) Components According to Suicidal Ideation (N= 1,298)

| Characteristics                         | All participants<br>(N= 1,298) |      | PHQ-9 Suicidal Ideation |      |                  |      | P-value <sup>a</sup> |
|-----------------------------------------|--------------------------------|------|-------------------------|------|------------------|------|----------------------|
|                                         |                                |      | No<br>(N = 1,188)       |      | Yes<br>(N = 110) |      |                      |
|                                         | n                              | %    | n                       | %    | n                | %    |                      |
| <b>Sleep duration (hours)</b>           |                                |      |                         |      |                  |      |                      |
| ≤6.0                                    | 121                            | 9.3  | 101                     | 8.5  | 20               | 18.2 | 0.01                 |
| 6.1-7.0                                 | 251                            | 19.3 | 233                     | 19.6 | 18               | 16.4 |                      |
| 7.1-8.0                                 | 395                            | 30.4 | 366                     | 30.8 | 29               | 26.4 |                      |
| ≥ 8.1                                   | 531                            | 40.9 | 488                     | 41.1 | 43               | 39.1 |                      |
| <b>Sleep latency (minutes)</b>          |                                |      |                         |      |                  |      |                      |
| ≤ 15                                    | 795                            | 61.3 | 735                     | 61.9 | 60               | 54.5 | 0.02                 |
| 16-30                                   | 419                            | 32.3 | 383                     | 32.2 | 36               | 32.7 |                      |
| 31-60                                   | 75                             | 5.8  | 61                      | 5.1  | 14               | 12.7 |                      |
| ≥ 60                                    | 9                              | 0.7  | 9                       | 0.8  | 0                | 0.0  |                      |
| <b>Daytime dysfunction due to sleep</b> |                                |      |                         |      |                  |      |                      |
| Never                                   | 753                            | 58.0 | 720                     | 60.6 | 33               | 30.0 | <0.001               |
| < Once a week                           | 433                            | 33.4 | 379                     | 31.9 | 54               | 49.1 |                      |
| 1-2 times per week                      | 102                            | 7.9  | 82                      | 6.9  | 20               | 18.2 |                      |
| ≥ 3 times per week                      | 10                             | 0.8  | 7                       | 0.6  | 3                | 2.7  |                      |
| <b>Sleep efficiency (%)</b>             |                                |      |                         |      |                  |      |                      |
| ≥ 85                                    | 1274                           | 98.2 | 1166                    | 98.2 | 108              | 98.2 | 0.21                 |
| 75-84                                   | 15                             | 1.2  | 15                      | 1.3  | 0                | 0.0  |                      |
| 65-74                                   | 5                              | 0.4  | 4                       | 0.3  | 1                | 0.9  |                      |
| < 65                                    | 4                              | 0.3  | 3                       | 0.3  | 1                | 0.9  |                      |
| <b>Sleep medicine during past month</b> |                                |      |                         |      |                  |      |                      |
| Never                                   | 1295                           | 99.8 | 1186                    | 99.8 | 109              | 99.1 | 0.23                 |
| < once a week                           | 0                              | 0.0  | 0                       | 0.0  | 0                | 0.0  |                      |
| 1-2 times per week                      | 2                              | 0.2  | 1                       | 0.1  | 1                | 0.9  |                      |
| ≥ 3 times per week                      | 1                              | 0.1  | 1                       | 0.1  | 0                | 0.0  |                      |
| <b>Overall sleep quality</b>            |                                |      |                         |      |                  |      |                      |
| Good (PSQI ≤ 5)                         | 1079                           | 83.1 | 1018                    | 85.7 | 61               | 55.5 | <0.001               |
| Poor (PSQI > 5)                         | 219                            | 16.9 | 170                     | 14.3 | 49               | 44.5 |                      |

<sup>a</sup>: P-value was calculated from Chi-Square test or Fisher's exact test.
